# Supplementary material for: Sulfated CXCR3 Peptide Trap Use as a Promising Therapeutic Approach for Age-Related Macular Degeneration
Source: MDPI journal article supplement (doi:10.3390/biomedicines12010241), 2024-01-22
Supplement: s1 [file s1]

# Sulfated CXCR3 Peptide Trap Use as a Promising Therapeutic Approach for Age-Related Macular Degeneration

GukHeui Jo <sup>1,†</sup>, Jae-Byoung Chae <sup>2,†</sup>, Sun-Ah Jung <sup>1</sup>, Jungmook Lyu <sup>3</sup>, Hyewon Chung <sup>2,\*</sup>  
and Joon H. Lee <sup>1,\*</sup>

<sup>1</sup> Myung-Gok Eye Research Institute, Kim's Eye Hospital, Konyang University College of Medicine, Seoul 07301, Republic of Korea

<sup>2</sup> Department of Ophthalmology, Konkuk University College of Medicine, Seoul 05029, Republic of Korea

<sup>3</sup> Department of Medical Science, Konyang University, Seo-gu, Daejeon 35365, Republic of Korea

\* Correspondence: joonhlee@konyang.ac.kr (H.C.); hchung@kuh.ac.kr (J.H.L.); Tel.: +82-2-2637-7871 (H.C.); 82-2-2030-7657 (J.H.L.)

† These authors contributed equally to this study.

## Supplementary Material

### Supplementary Figures

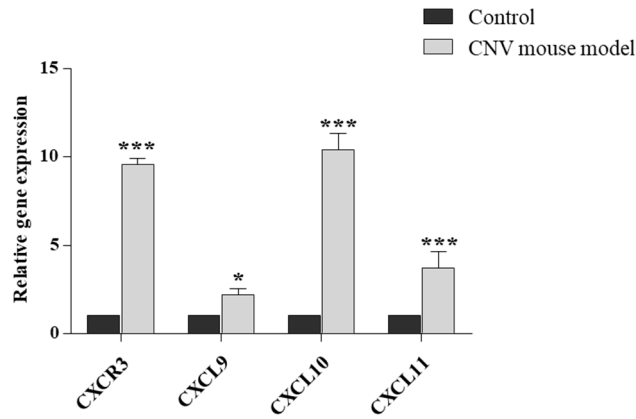

**Figure S1.** Quantification of mRNA expression of CXCR3 and its ligands (CXCL9, CXCL10, and CXCL11) in the RPE/choroid complex from a control group and a laser-induced CNV mouse model (n=3). \*\*\*  $p < 0.001$ , \*  $p < 0.05$ .

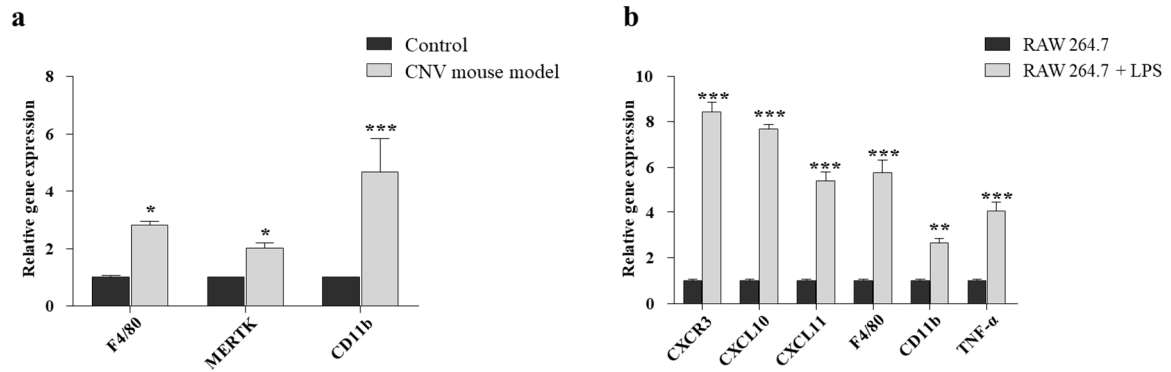

**Figure S2.** Quantification of mRNA expression of markers related to macrophages in mouse RPE/choroid and RAW 264.7 cells. (a) mRNA expression of macrophage related genes, including F4/80, MERTK and CD11b were increased in RPE/choroid complex from a laser-induced CNV model compared to a control group (n=3). (b) Quantification of mRNA expression in RAW 264.7 cells. In LPS-treated group, the expression of CXCR3, its ligands, and macrophage related genes has increased compared to control group (n=3). \*\*\*  $p < 0.001$ , \*\*  $p < 0.01$ , \*  $p < 0.05$ .

## Supplementary Table

**Table S1.** CXCR3 primers used in oligo shuffling. In total, 10 oligos (39 nt in length) were synthesized.

| Primer        | Sequence (5' to 3')                                               |
|---------------|-------------------------------------------------------------------|
|               | 1F: aaa gat atc atg gtc ctt gag gtg agt gac cac caa gtg           |
|               | 2F: ctt aat gac gcc gag gtt gcc gcc ctc ctg gag aac ttc           |
|               | 3F: agc tct tcc tat gac tat ggt gaa aac gag agt gac tcg           |
|               | 4F: tgc tgt acc tcc ccg ccg tgc cca cag gac ttc agc ctg           |
|               | 5F: aac ttc gac cgc ctc gag aaa aaa aaa aaa aaa aaa aaa           |
| <i>hCXCR3</i> | 3F sulfation: agc tct tcc tag gac tag ggt gaa aac gag agt gac tcg |
|               | 1R: ttt ctc gag gcg gtc gaa gtt cag gct gaa gtc ctg tgg           |
|               | 2R: gca cgg cgg gga ggt aca gca cga gtc act ctc gtt ttc           |
|               | 3R: acc ata gtc ata gga aga gct gaa gtt ctc cag gag ggc           |
|               | 4R: ggc aac ctc ggc gtc att aag cac ttg gtg gtc act cac           |
|               | 5R: ctc aag gac cat gat atc ttt ttt ttt ttt ttt ttt               |
|               | 3R sulfation: acc cta gtc cta gga aga gct gaa gtt ctc cag gag ggc |
|               | 1F:aaa gga tcc atg tac ctt gag gtt agt gaa cgt caa                |
|               | 2F:gtg ctt gat gcc tcg gac ttt gcc ttt ctt ctg gaa aac            |
|               | 3F: agc acc tct ccg tac gat tat ggc gaa aac gag agc gac           |
|               | 4F:ttc tct gac tcc ccg ccg tgc cca cag gat ttc agc                |
|               | 5F:ctg aac ttt gac cgt ctc gag ttt ttt ttt ttt ttt                |
| <i>mCXCR3</i> | 3F sulfation: agc acc tct ccg tag gat tag ggc gaa aac gag agc gac |
|               | 1R: aaa ctc gag acg gtc aaa gtt cag gct gaa atc ctg tgg           |
|               | 2R: gca cgg cgg gga gtc aga gaa gtc gct ctc gtt ttc gcc           |
|               | 3R: ata atc gta cgg aga ggt gct gtt ttc cag aag aaa ggc           |
|               | 4R: aaa gtc cga ggc atc aag cac ttg acg ttc act aac               |
|               | 5R: ctc aag gta cat gga tcc ttt ttt ttt ttt ttt ttt               |
|               | 3R sulfation: cta atc cta cgg aga ggt gct gtt ttc cag aag aaa ggc |

**Table S2.** Sequence of CXCR3 amino acid and prtein estimated size.

| Protein       | Type      | Amino acid sequence                                            | size        |
|---------------|-----------|----------------------------------------------------------------|-------------|
| <i>hCXCR3</i> | wt        | MYLEVSRQVLDAADFALLENSTSPYDYGENESDFSDSPPCPQDF<br>SLNFDR (52)    | 5.72<br>kDa |
|               | sulfation | MYLEVSRQVLDAADFALLENSTSPYDYGENESDFSDSPPCPQDF<br>SLNFDR (52)    | 5.72<br>kDa |
| <i>mCXCR3</i> | wt        | MVLEVSDHQVLNDAEVAALLENFSSSYDYGENESDSCCTSPPCPQ<br>DFSLNFDR (53) | 5.83<br>Kda |
|               | sulfation | MVLEVSDHQVLNDAEVAALLENFSSSYDYGENESDSCCTSPPCPQ<br>DFSLNFDR (53) | 5.83<br>Kda |

Red: Sulfation site.

**Table S3.** List of primers used in PCR reactions.

| <b>Gene</b>                    | <b>Forward primer (5'-3')</b> | <b>Reverse primer (5'-3')</b> |
|--------------------------------|-------------------------------|-------------------------------|
| <b>CXCR3</b>                   | TACGATCAGCGCCTCAATGCCA        | AGCAGGAAACCAGCCACTAGCT        |
| <b>CXCL9</b>                   | CCTAGTGATAAGGAATGCACGATG      | CTAGGCAGGTTTGATCTCCGTTT       |
| <b>CXCL10</b>                  | ATCATCCCTGCGAGCCTATCCT        | GACCTTTTTTGGCTAAACGCTTTC      |
| <b>CXCL11</b>                  | CCGAGTAACGGCTGCGACAAAG        | CCTGCATTATGAGGCGAGCTTG        |
| <b>F4/80</b>                   | GCTCTCCATCTGCCTTTTCCTG        | GGAAGCCAAGTAGAGGTAGTGC        |
| <b>MERTK</b>                   | ATCATCCTCGGCTGCTTCTGTG        | ACGACCAGTTGGGAATCCTCCT        |
| <b>CD11b</b>                   | TACTTCGGGCAGTCTCTGAGTG        | ATGGTTGCCTCCAGTCTCAGCA        |
| <b>TNF-<math>\alpha</math></b> | GGTGCCTATGTCTCAGCCTCTT        | GCCATAGAAGTATGAGAGGGAG        |
